# Supplementary material
Source: publisher figshare collection journal article supplement (https://acs.figshare.com/ndownloader/files/22788146)
Supplement: Supplementary file 1 [file 22788146]

## Supporting Information

### **Ferrocene Functionalized UCNP Nanosystem with Efficient Near-Infrared-Light Promoted Fenton-like Reaction for Tumor Growth Suppression**

Jimin Zhou,<sup>†</sup> Xiangfeng Zhu,<sup>†</sup> Qianya Cheng,<sup>†</sup> Yuxuan Wang,<sup>‡</sup> Ruiqi Wang,<sup>†</sup> Xingwen Cheng,<sup>§</sup> Jiajia Xu,<sup>§</sup> Kuntang Liu,<sup>//</sup> Lin Li,<sup>§</sup> Xueming Li,<sup>//</sup> Mingfang He,<sup>//</sup> Jian Wang,<sup>⊥</sup> Heng Xu,<sup>//</sup> Su Jing,<sup>\*,†</sup> and Ling Huang<sup>\*,§</sup>

---

<sup>†</sup>School of Chemistry and Molecular Engineering, <sup>//</sup> School of Pharmaceutical Sciences, Nanjing Tech University, Nanjing 211816, China.

<sup>‡</sup>Department of Chemistry, University of Calgary, 2500 University Drive, Calgary, T2N 1N4, Canada.

<sup>§</sup>Institute of Advanced Materials, Nanjing Tech University, Nanjing 210009, China.

<sup>⊥</sup>Department of Geriatric Oncology, The First Affiliated Hospital of Nanjing Medical University, Nanjing 210029, China.

## Contents

**Figure S1.** Absorption spectra of **Fc1-Fc5** in CH<sub>3</sub>CN.

**Figure S2.** TEM images of OA-UCNP.

**Figure S3.** FT-IR spectra of UCNP (black line), **Fc2** (green line) and **Fc2-UCNP** (red line).

**Figure S4.** FT-IR spectra of UCNP (black line), **Fc3** (green line) and **Fc3-UCNP** (red line).

**Figure S5.** FT-IR spectra of UCNP (black line), **Fc4** (green line) and **Fc4-UCNP** (red line).

**Figure S6.** FT-IR spectra of UCNP (black line), **Fc5** (green line) and **Fc5-UCNP** (red line).

**Figure S7.** UV-Vis absorption spectra of removal of MB.

**Figure S8.** The DLS distribution graph of **OA-UCNP-Lipo**.

**Figure S9.** The DLS distribution graph of **Fc1-UCNP-Lipo**.

**Figure S10.** The DLS distribution graph of **Fc2-UCNP-Lipo**.

**Figure S11.** The DLS distribution graph of **Fc3-UCNP-Lipo**.

**Figure S12.** The DLS distribution graph of **Fc4-UCNP-Lipo**.

**Figure S13.** The DLS distribution graph of **Fc5-UCNP-Lipo**.

**Figure S14.** H<sub>2</sub>O<sub>2</sub> concentration in different cell line.

**Figure S15.** Weight change curve of AGS solid tumor-bearing mice during 10 days after different treatments. Data are expressed as mean  $\pm$  standard errors (4 mice per group),  $p > 0.05$ .

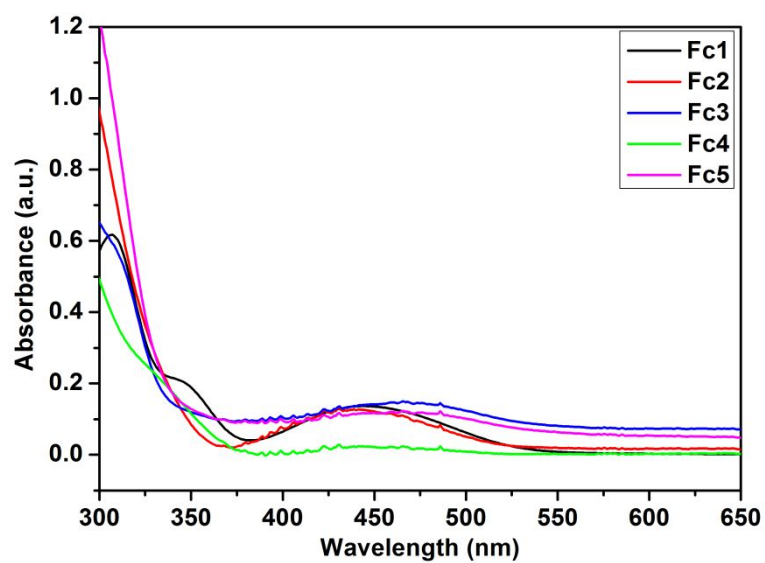

**Figure S1.** Absorption spectra of **Fc1-Fc5** in CH<sub>3</sub>CN.

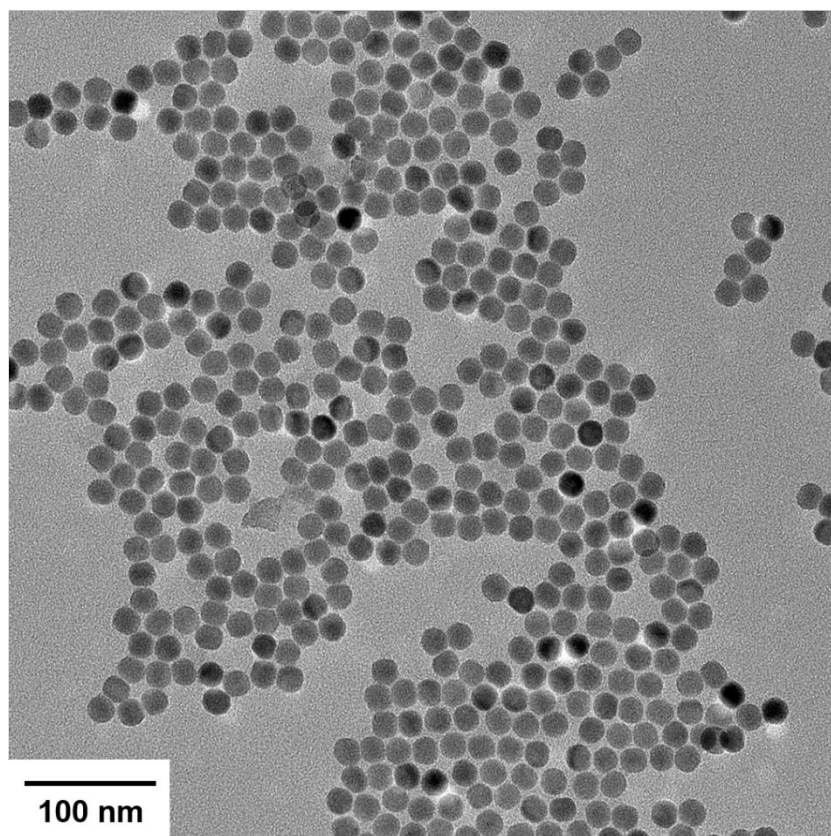

**Figure S2.** TEM images of OA-UCNP.

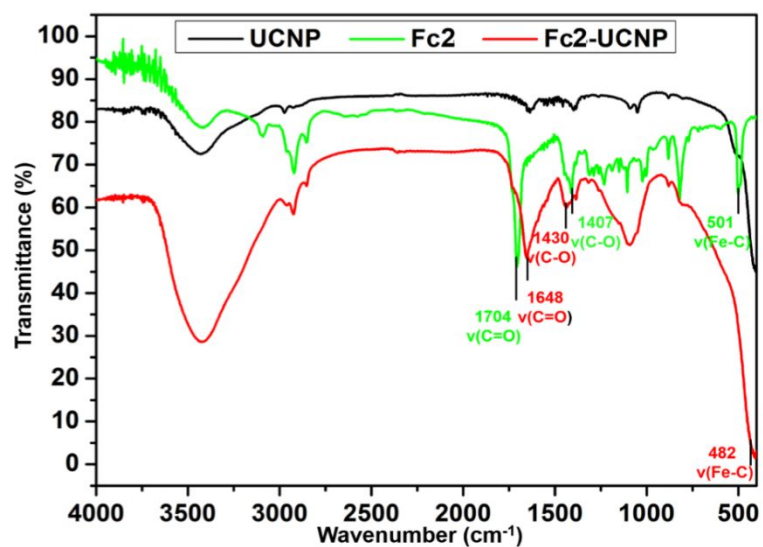

**Figure S3.** FTIR spectra of UCNP (black line), Fc2 (green line) and Fc2-UCNP (red line).

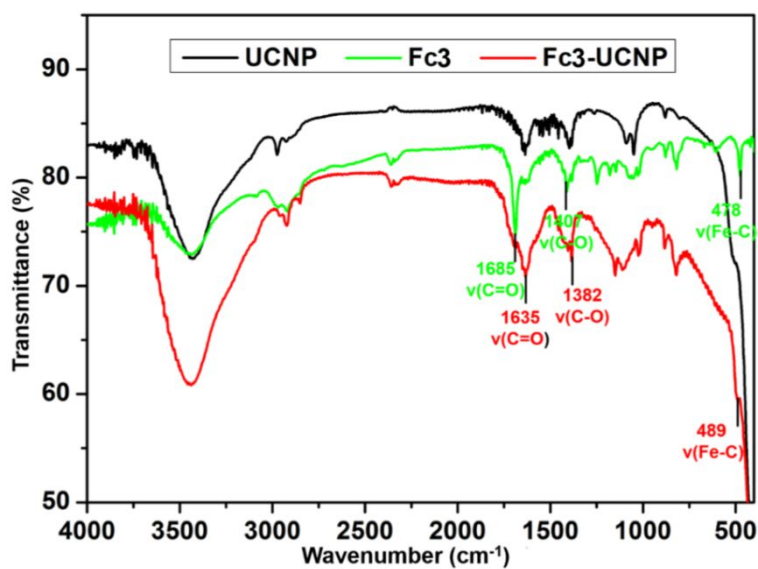

**Figure S4.** FTIR spectra of UCNP (black line), Fc3 (green line) and Fc3-UCNP (red line).

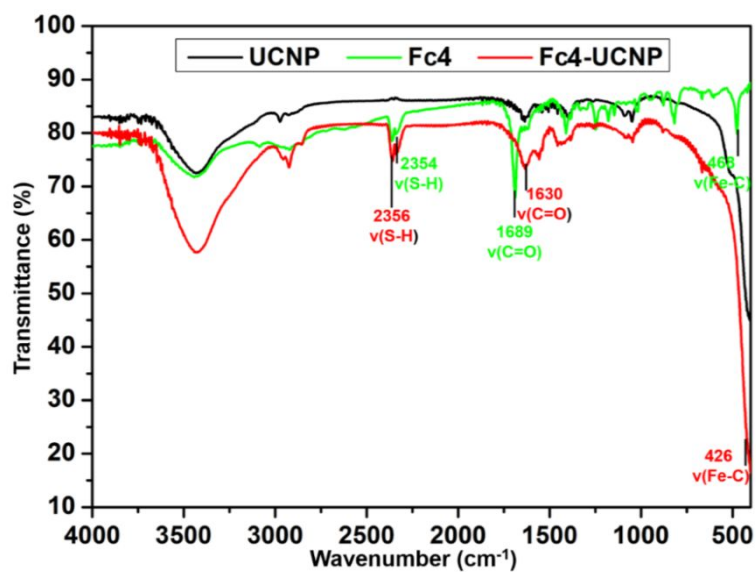

**Figure S5.** FTIR spectra of UCNP (black line), **Fc4** (green line) and **Fc4-UCNP** (red line).

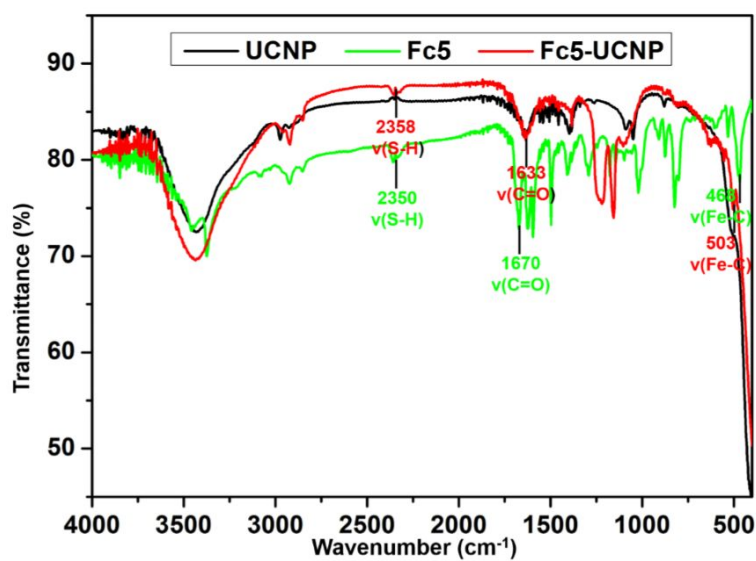

**Figure S6.** FTIR spectra of UCNP (black line), **Fc5** (green line) and **Fc5-UCNP** (red line).

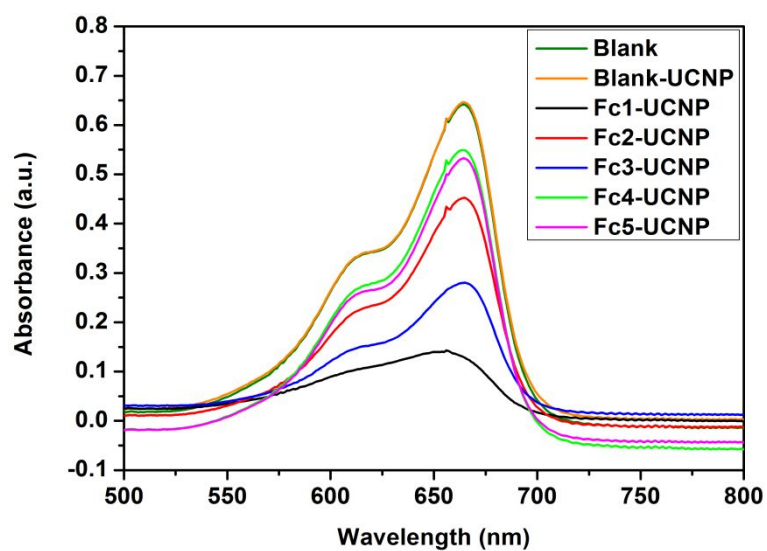

**Figure S7.** UV-Vis absorption spectra of removal of MB.

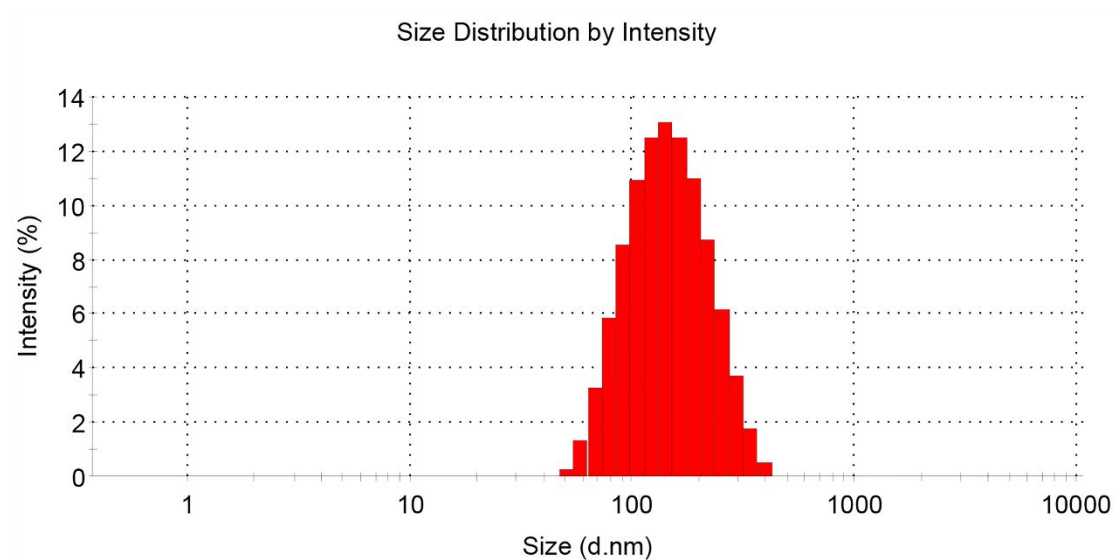

**Figure S8.** The DLS distribution graph of OA-UCNP-Lipo.

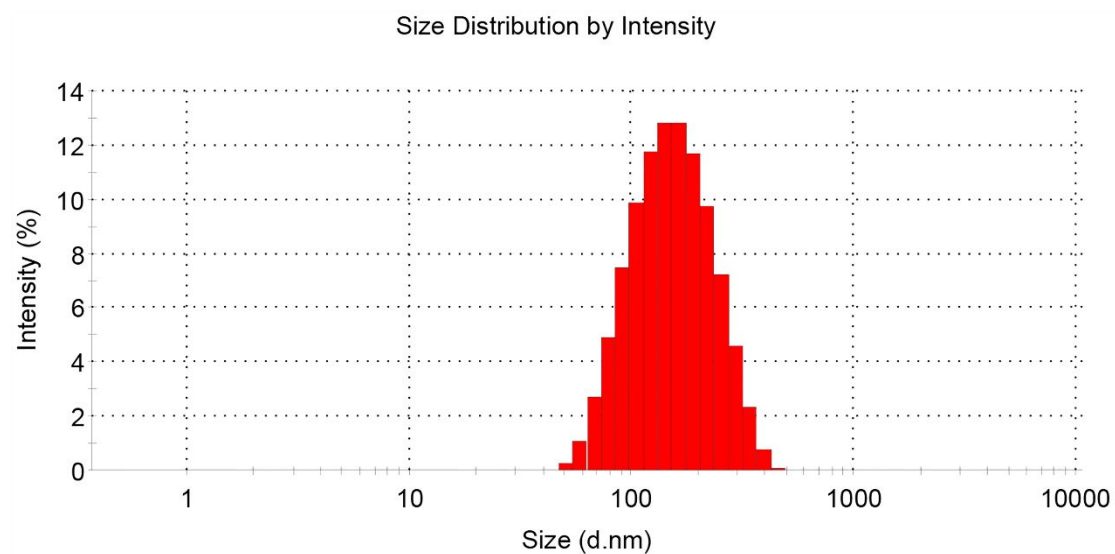

**Figure S9.** The DLS distribution graph of **Fc1**-UCNP-Lipo.

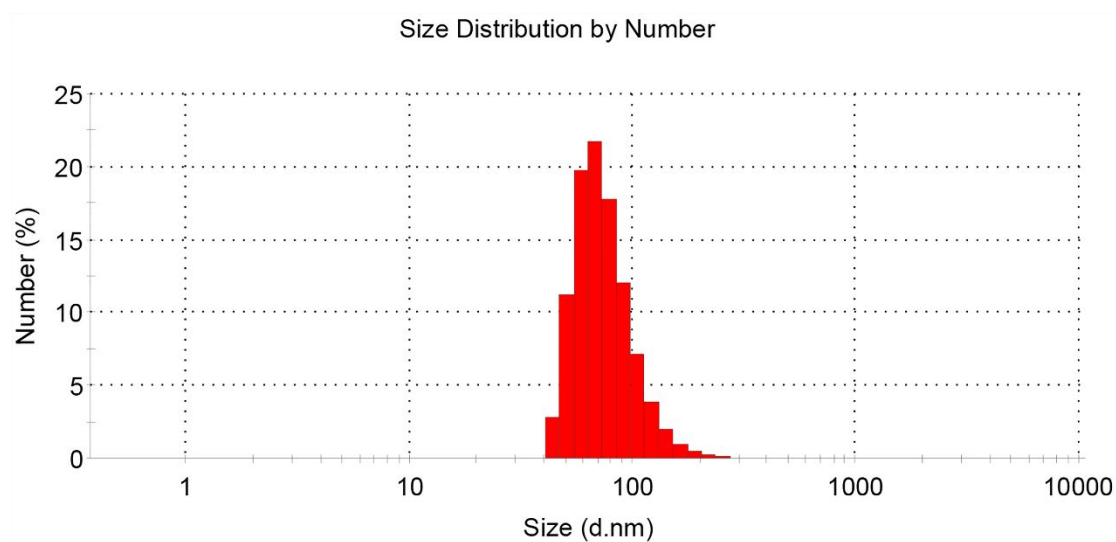

**Figure S10.** The DLS distribution graph of **Fc2**-UCNP-Lipo.

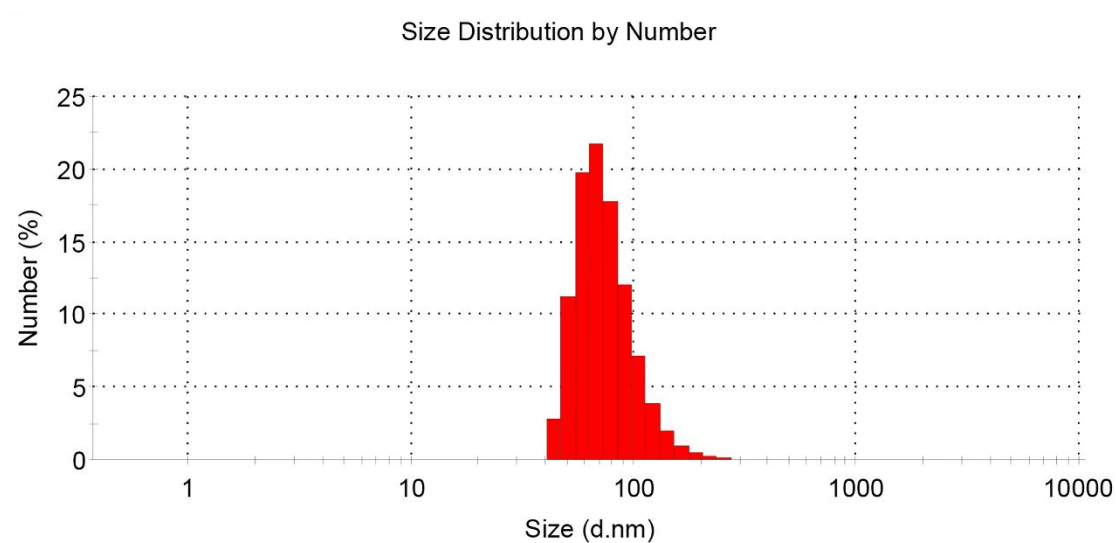

**Figure S11.** The DLS distribution graph of **Fc3**-UCNP-Lipo.

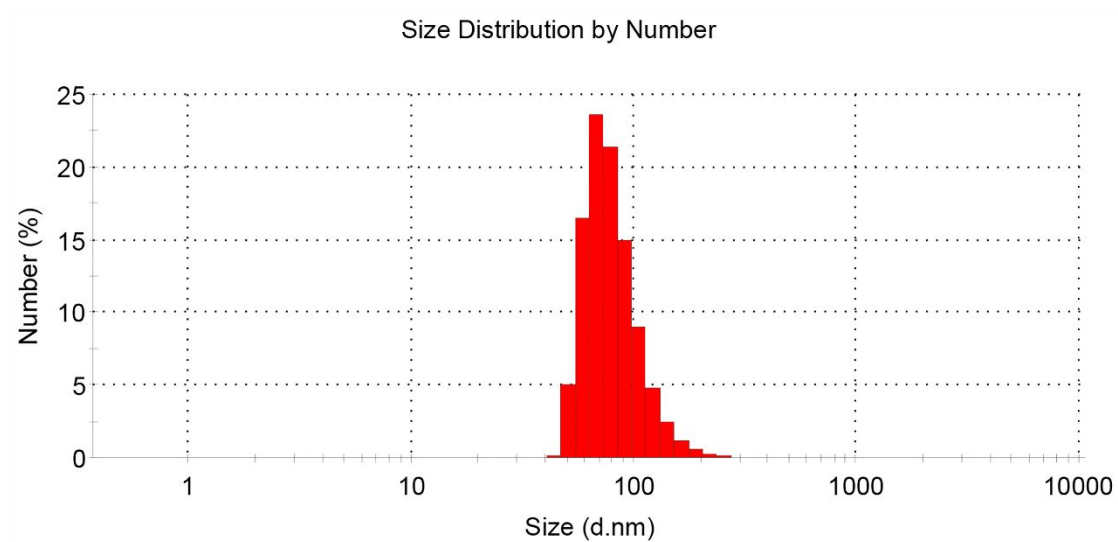

**Figure S12.** The DLS distribution graph of **Fc4**-UCNP-Lipo.

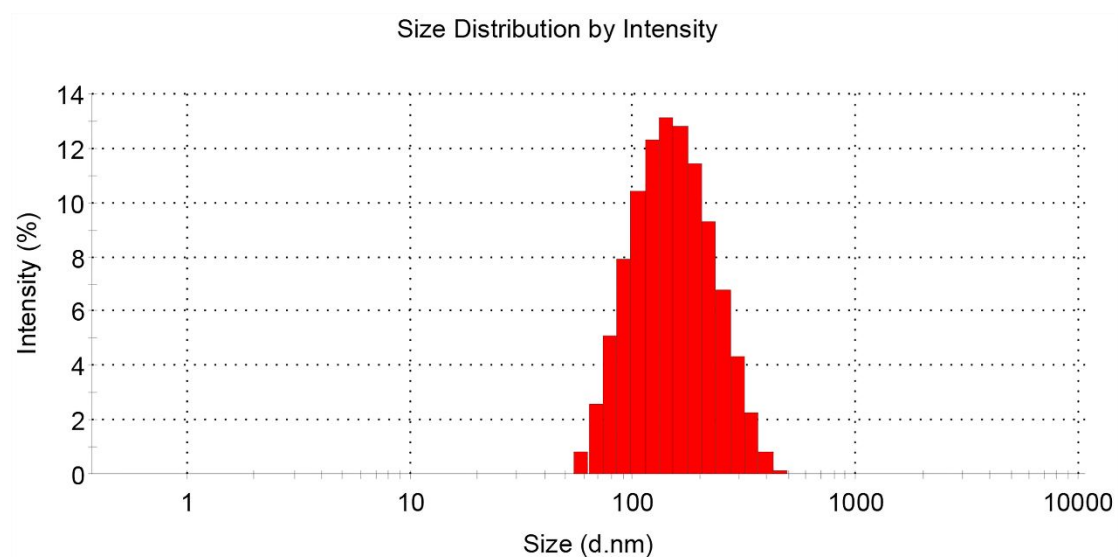

**Figure S13.** The DLS distribution graph of **Fc5**-UCNP-Lipo.

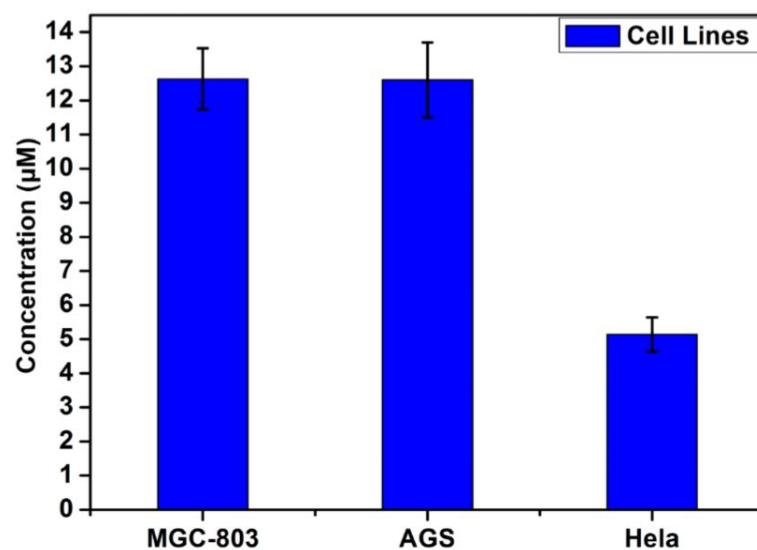

**Figure S14.**  $\text{H}_2\text{O}_2$  concentration in different cell line.

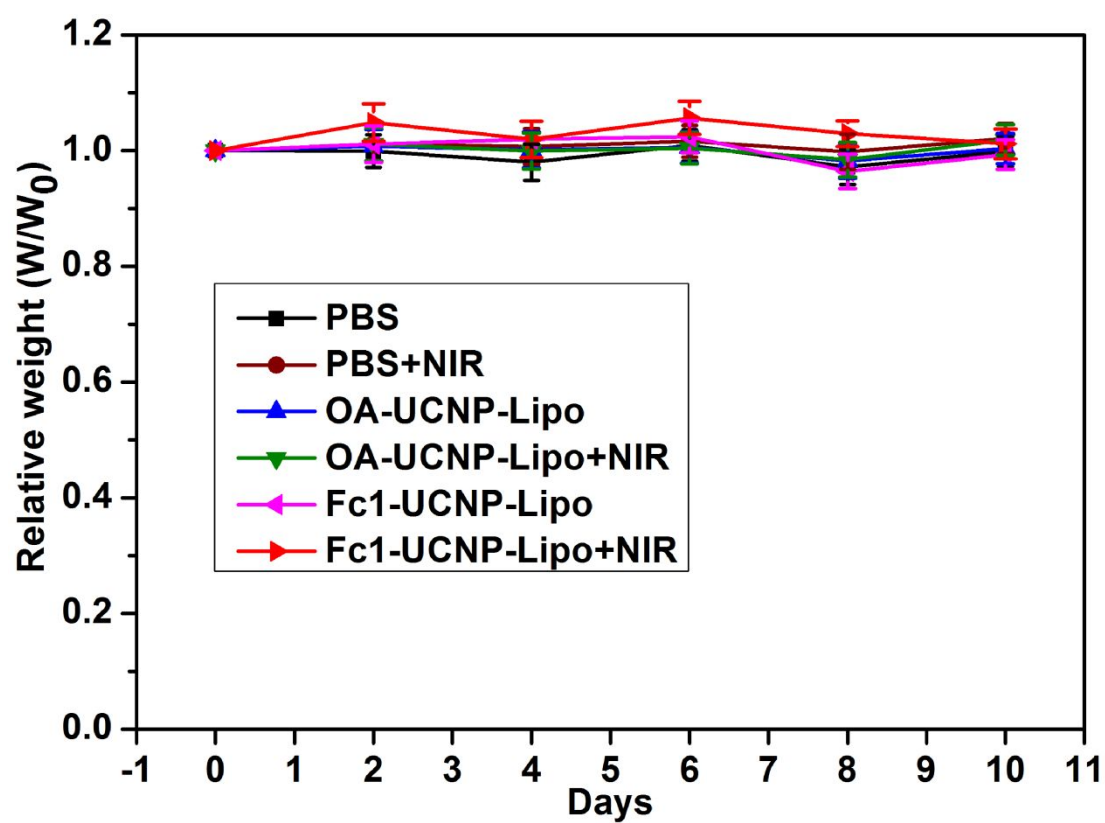

**Figure S15.** Weight change curve of AGS solid tumor-bearing mice during 10 days after different treatments. Data are expressed as mean  $\pm$  SD (4 mice per group),  $p > 0.05$ .
